# Supplementary material for: Alliin, a Garlic (Allium sativum) Compound, Prevents LPS-Induced Inflammation in 3T3-L1 Adipocytes
Source: Hindawi journal article supplement (doi:10.1155/2013/381815), 2013-01-01
Supplement: f1 [file 381815.f1.pdf]

Table 1-SM

| CLS | Enrichment score | Function                                                           | p-value  | Benjamini | Genes included | Gene examples                                                       | Ref                                                                   |
|-----|------------------|--------------------------------------------------------------------|----------|-----------|----------------|---------------------------------------------------------------------|-----------------------------------------------------------------------|
| 1   | 3.52             | Circulatory system process, vasodilatation                         | 1.70E-04 | 6.40E-02  | 7              | Angiotensin II receptor, Type 1a neurotensin                        | Br J Pharmacol. 116(5):2524-30. 1995. BBA. 1813(10):1863-71. 2011.    |
| 2   | 2.80             | Thyroglobulin type-1                                               | 7.60E-04 | 7.80E-02  | 4              | Thyroglobulin type-1                                                | Bull Exp Biol Med. 152(2):253-7. 2011                                 |
| 3   | 2.15             | Response to peptide hormone stimulus                               | 8.00E-03 | 3.40E-01  | 7              | Alpha-2-HS-glycoprotein (AHSG)                                      | Inflammation. 15(5):369-79. 1991.                                     |
| 4   | 2.06             | Methylation                                                        | 8.30E-03 | 3.00E-01  | 8              | -                                                                   | -                                                                     |
| 5   | 2.05             | Cell motility, migration                                           | 3.90E-03 | 2.90E-01  | 10             | Chemokine (C-C motif) receptor 4<br>Lysosomal trafficking regulator | J Exp Med. 191(10):1755-64. 2000.<br>J Immunol. 166(7):4586-95. 2001. |
| 6   | 2.01             | Cytoplasmic membrane-bounded vesicle                               | 4.60E-03 | 2.50E-01  | 14             | Angiotensin II receptor, Type 1a neurotensin                        | Br J Pharmacol. 116(5):2524-30. 1995. BBA. 1813(10):1863-71. 2011.    |
| 7   | 1.90             | Respiratory system development                                     | 6.80E-03 | 3.10E-01  | 7              | Cytochrome P450, family 1, subfamily a, polypeptide 2               | Neuro Endocrinol Lett.;30 Suppl 1:41-5. 2009.                         |
| 8   | 1.79             | DNA/RNA helicase, DEAD/DEAH box type, ATP-binding                  | 6.20E-03 | 7.60E-01  | 7              | HLA-B-associated transcript 1A                                      | DNA Seq.17(4):292-9. 2006                                             |
| 9   | 1.74             | Positive regulation of phagocytosis and vesicle-mediated transport | 5.40E-03 | 3.20E-01  | 5              | Fc receptor, IgG, low affinity III<br>CD209b antigen                | PLoS Pathog. 5(6):e1000464. 2009<br>J Immunol. 184(5):2627-37. 2010.  |
| 10  | 1.62             | ATP-dependent helicase activity                                    | 1.30E-02 | 4.50E-01  | 6              | HLA-B-associated transcript 1A                                      | DNA Seq.17(4):292-9. 2006                                             |

Table 2-SM

| Functional category                                     | GENBANK ACCESSION | Gene encoding for                                                                               |
|---------------------------------------------------------|-------------------|-------------------------------------------------------------------------------------------------|
| Phospholipid and organophosphate metabolic process      | 428165            | 1-acylglycerol-3-phosphate O-acyltransferase 5 (lysophosphatidic acid acyltransferase, epsilon) |
|                                                         | 478756            | phosphatidylinositol 3-kinase catalytic delta polypeptide                                       |
|                                                         | 464983            | phosphatidylinositol 3-kinase, C2 domain containing, gamma polypeptide                          |
|                                                         | 424204            | phosphatidylinositol glycan anchor biosynthesis, class M                                        |
|                                                         | 447430            | phosphorylase kinase alpha 1                                                                    |
|                                                         | 435646            | receptor-like tyrosine kinase                                                                   |
| Positive regulation of immune effector process          | 425225            | forkhead box P1                                                                                 |
|                                                         | 474977            | immunoglobulin heavy chain 3 (serum IgG2b); (gamma polypeptide)                                 |
|                                                         | 453008            | retinoic acid early transcript 1E; beta; alpha; delta; gamma                                    |
| Microtubule, cytoskeleton, motor protein, cell motility | 430572            | kinesin family member 17                                                                        |
|                                                         | 479264            | myosin XV                                                                                       |
|                                                         | 426096            | similar to Kinesin-like protein KIF2C (Mitotic centromere-associated kinesin) (MCAK)            |
|                                                         | 450158            | tubulin tyrosine ligase-like family, member 9                                                   |
|                                                         | 451630            | deleted in colorectal carcinoma                                                                 |
|                                                         | 435514            | laminin B1 subunit 1                                                                            |
|                                                         | 435646            | receptor-like tyrosine kinase                                                                   |
|                                                         | 435290            | Hermansky-Pudlak syndrome 4 homolog (human)                                                     |
|                                                         | 443300            | thymoma viral proto-oncogene 1 interacting protein                                              |
| Purine ribonucleotide binding, GTP binding, ATP binding | 483211            | Era (G-protein)-like 1 (E. coli)                                                                |
|                                                         | 460221            | RIKEN cDNA 1810035L17 gene                                                                      |
|                                                         | 465328            | dedicator of cytokinesis 6                                                                      |
|                                                         | 456817            | developmentally regulated GTP binding protein 1                                                 |
|                                                         | 449090            | glyoxylate reductase/hydroxypyruvate reductase                                                  |
|                                                         | 430572            | kinesin family member 17                                                                        |
|                                                         | 457106            | ligase I, DNA, ATP-dependent                                                                    |
|                                                         | 464176            | mitochondrial translational initiation factor 2                                                 |
|                                                         | 464581            | mutS homolog 3 (E. coli)                                                                        |
|                                                         | 479264            | myosin XV                                                                                       |
|                                                         | 478756            | phosphatidylinositol 3-kinase catalytic delta polypeptide                                       |
|                                                         | 464983            | phosphatidylinositol 3-kinase, C2 domain containing, gamma polypeptide                          |
|                                                         | 461623            | polypyrimidine tract binding protein 2                                                          |
|                                                         | 435646            | receptor-like tyrosine kinase                                                                   |
|                                                         | 426096            | similar to Kinesin-like protein KIF2C (Mitotic centromere-associated kinesin) (MCAK)            |
| Iron ion binding                                        | 474237            | cystathionine beta-synthase                                                                     |
|                                                         | 480553            | cytochrome P450, family 2, subfamily c, polypeptide 68                                          |
|                                                         | 468579            | cytochrome P450, family 2, subfamily g, polypeptide 1                                           |
| Transcription                                           | 427656            | Kruppel-like factor 16                                                                          |

|                                      |        |                                                                                                 |
|--------------------------------------|--------|-------------------------------------------------------------------------------------------------|
| regulation, zinc finger binding      | 425225 | forkhead box P1                                                                                 |
|                                      | 440843 | paternally expressed 3; antisense transcript gene of Peg3                                       |
|                                      | 435860 | zinc finger protein 292                                                                         |
|                                      | 461227 | zinc finger protein 92                                                                          |
|                                      | 431877 | bassoon                                                                                         |
|                                      | 430286 | deltex 2 homolog (Drosophila)                                                                   |
|                                      | 452394 | zinc finger, DHHC domain containing 4                                                           |
|                                      | 478297 | calcium channel, voltage-dependent, T type, alpha 1H subunit                                    |
|                                      | 424420 | delta-like 4 (Drosophila)                                                                       |
|                                      | 448999 | fumarylacetoacetate hydrolase                                                                   |
|                                      | 457106 | ligase I, DNA, ATP-dependent                                                                    |
|                                      | 423146 | solute carrier family 17 (sodium-dependent inorganic phosphate cotransporter), member 6         |
|                                      | 464581 | mutS homolog 3 (E. coli)                                                                        |
|                                      | 437690 | ubiquitin interaction motif containing 1                                                        |
|                                      | 444913 | Crm, cramped-like (Drosophila)                                                                  |
|                                      | 425239 | E74-like factor 1                                                                               |
|                                      | 460221 | RIKEN cDNA 1810035L17 gene                                                                      |
|                                      | 426391 | high mobility group 20 B                                                                        |
|                                      | 479919 | homeo box B13                                                                                   |
|                                      | 458966 | polymerase (RNA) I polypeptide D; predicted gene 12751                                          |
|                                      | 472076 | nucleolar protein 12                                                                            |
| Apoptosis                            | 451630 | deleted in colorectal carcinoma                                                                 |
|                                      | 476880 | histidine triad nucleotide binding protein 2                                                    |
|                                      | 440843 | paternally expressed 3; antisense transcript gene of Peg3                                       |
|                                      | 443300 | thymoma viral proto-oncogene 1 interacting protein                                              |
| Cytoplasmic membrane-bounded vesicle | 435290 | Hermansky-Pudlak syndrome 4 homolog (human)                                                     |
|                                      | 461196 | proacrosin binding protein                                                                      |
|                                      | 423146 | solute carrier family 17 (sodium-dependent inorganic phosphate cotransporter), member 6         |
|                                      | 431877 | bassoon                                                                                         |
|                                      | 468924 | paraoxonase 1                                                                                   |
|                                      | 435646 | receptor-like tyrosine kinase                                                                   |
|                                      | 436778 | reversion-inducing-cysteine-rich protein with kazal motifs precursor (mRECK)                    |
| Integral to membrane                 | 428165 | 1-acylglycerol-3-phosphate O-acyltransferase 5 (lysophosphatidic acid acyltransferase, epsilon) |
|                                      | 480226 | acyl-malonyl condensing enzyme 1                                                                |
|                                      | 478297 | calcium channel, voltage-dependent, T type, alpha 1H subunit                                    |
|                                      | 482929 | chemokine (C-X-C motif) ligand 16                                                               |
|                                      | 451630 | deleted in colorectal carcinoma                                                                 |
|                                      | 424420 | delta-like 4 (Drosophila)                                                                       |
|                                      | 474977 | immunoglobulin heavy chain 3 (serum IgG2b); Immunoglobulin heavy chain (gamma polypeptide)      |

|        |                                                                                         |
|--------|-----------------------------------------------------------------------------------------|
| 424204 | phosphatidylinositol glycan anchor biosynthesis, class M                                |
| 445826 | prostaglandin D receptor                                                                |
| 435646 | receptor-like tyrosine kinase                                                           |
| 453008 | retinoic acid early transcript 1E; beta; alpha; delta; gamma                            |
| 435318 | retrotransposon-like 1; RIKEN cDNA 6430411K18 gene                                      |
| 436778 | reversion-inducing-cysteine-rich protein with kazal motifs precursor (mRECK)            |
| 423146 | solute carrier family 17 (sodium-dependent inorganic phosphate cotransporter), member 6 |
| 441284 | solute carrier family 35, member B4                                                     |
| 456728 | solute carrier family 7 (cationic amino acid transporter, $\gamma^+$ system), member 9  |
| 434029 | transmembrane protein 14A                                                               |
| 421600 | transmembrane protein 81                                                                |
| 452394 | zinc finger, DHHC domain containing 4                                                   |

---

Table 3-SM

**Genes highly expressed in 3T3-L1 adipocytes by alliin  
pretreatment and after LPS stimuli**

| <b>Genbank</b> | <b>Gene name</b>                        | <b>z-score</b> |
|----------------|-----------------------------------------|----------------|
| AF041900       | T-cell receptor beta chain              | 3.40           |
| NM_009566      | Zfp92                                   | 3.20           |
| M27752         | Ig rearranged H-chain V-region          | 3.05           |
| M17518         | lactate dehydrogenase A-4 pseudogene    | 2.96           |
| X53400         | Igh-V7183                               | 2.94           |
| AF357337       | unclassified gene                       | 2.90           |
| AJ293625       | Slirp                                   | 2.85           |
| AF158133       | T-cell receptor beta chain V-D-J region | 2.81           |
| NM_013809      | Cyp2g1                                  | 2.78           |
| AJ400981       | Igh-VI55H                               | 2.78           |
| NM_018866      | Cxcl13                                  | 2.76           |
| U43721         | Cbs                                     | 2.75           |
| NM_025582      | Fam213b / C1orf93                       | 2.75           |
| AK011474       | Cnpy4                                   | 2.72           |
| Z12217         | T-cell receptor beta chain Vbeta8 (VDJ) | 2.71           |
| X86534         | Igh-VH10B8                              | 2.71           |
| AK014355       | unclassified gene                       | 2.68           |
| NM_021480      | Tdh                                     | 2.68           |

|           |                                  |      |
|-----------|----------------------------------|------|
| Z86011    | T-cell receptor, V-J beta region | 2.67 |
| NM_011618 | Tnnt1                            | 2.65 |
| X80972    | Igh-gamma polypeptide            | 2.63 |
| BC012400  | Acaa1a                           | 2.63 |
| NM_008840 | Pik3cd                           | 2.62 |
| NM_008832 | Phka1                            | 2.59 |
| AK018247  | unclassified gene                | 2.58 |
| AK004497  | Hint2                            | 2.53 |
| X66457    | Igh-V10C5                        | 2.52 |
| NM_016736 | Nub1                             | 2.52 |

Table 4-SM

**Genes that decrease their expression in 3T3-L1  
adipocytes by alliin pretreatment and after LPS stimuli**

| <b>Genbank</b> | <b>Gene name</b>              | <b>z-score</b> |
|----------------|-------------------------------|----------------|
| NM_007832      | Dck                           | -6.19          |
| NM_008267      | Hoxb13                        | -5.23          |
| AF146224       | Hmg20b                        | -5.18          |
| AF301017       | Cxcl16                        | -3.72          |
| AK010802       | unclassified gene             | -3.60          |
| U34828         | Rny1                          | -3.55          |
| S72845         | Ig V lambda 1 variable region | -3.51          |
| NM_009087      | Polr1d                        | -3.44          |
| U22015         | Uimc1                         | -3.41          |
| AK007003       | unclassified gene             | -3.28          |
| AK013609       | Zdhhc4                        | -3.26          |
| AK016406       | unclassified gene             | -3.26          |
| NM_007920      | Elf1                          | -3.22          |
| AK021335       | Thyn1                         | -3.20          |
| AF339103       | Foxp1                         | -3.17          |
| NM_008962      | Ptgdr                         | -3.12          |
| BC013701       | Nol12                         | -3.09          |

|           |                   |       |
|-----------|-------------------|-------|
| NM_026545 | Psmc8             | -3.07 |
| AK015506  | unclassified gene | -3.02 |
| AK018293  | Grhpr             | -3.02 |
| NM_010862 | Myo15             | -2.98 |
| AB015423  | Dtx2              | -2.97 |
| NM_016678 | Reck              | -2.97 |
| NM_010176 | Fah               | -2.89 |
| AK009275  | Commd8            | -2.87 |
| L10896    | Peg3              | -2.87 |
| NM_010715 | Lig1              | -2.84 |
| AK007343  | Hsbp111           | -2.82 |
| NM_019550 | Ptbp2             | -2.76 |
| BC006841  | Kif2c             | -2.67 |
| AK006390  | unclassified gene | -2.65 |
| AK006570  | unclassified gene | -2.61 |
| NM_011084 | Pik3c2g           | -2.59 |
| AK005580  | unclassified gene | -2.59 |
| AK008195  | Aamd              | -2.59 |
